**Statement of Ownership, Management, and Circulation**  
**(All Periodicals Publications Except Requester Publications)**

PS Form 3526

|                                                                                                                                                                                                                                                                                                                                                                                                                                                                                                                                                                         |                                                          |                                           |                                                             |
|-------------------------------------------------------------------------------------------------------------------------------------------------------------------------------------------------------------------------------------------------------------------------------------------------------------------------------------------------------------------------------------------------------------------------------------------------------------------------------------------------------------------------------------------------------------------------|----------------------------------------------------------|-------------------------------------------|-------------------------------------------------------------|
| 1. Publication Title<br>AMERICAN PSYCHIATRIC PUBLISHING INC/<br>FOCUS                                                                                                                                                                                                                                                                                                                                                                                                                                                                                                   | 2. Publication Number<br>21577                           | ISSN<br>15414094                          | 3. Filing Date<br>09/23/2020                                |
| 4. Issue Frequency<br>QUARTERLY                                                                                                                                                                                                                                                                                                                                                                                                                                                                                                                                         | 5. Number of Issues Published Annually<br>4              | 6. Annual Subscription Price<br>\$ 690.00 |                                                             |
| 7. Complete Mailing Address of Known Office of Publication<br>800 MAINE AVE SW STE 900<br>WASHINGTON, DC 20024-2812                                                                                                                                                                                                                                                                                                                                                                                                                                                     |                                                          |                                           | Contact Person<br>BRIAN COLE<br>Telephone<br>(202) 459-9750 |
| 8. Complete Mailing Address of Headquarters or General Business Office of Publisher<br>800 Maine Ave S.W., Suite 900<br>Washington, DC 20024-2812                                                                                                                                                                                                                                                                                                                                                                                                                       |                                                          |                                           |                                                             |
| 9. Full Names and Complete Mailing Addresses of Publisher, Editor, and Managing Editor                                                                                                                                                                                                                                                                                                                                                                                                                                                                                  |                                                          |                                           |                                                             |
| Publisher (Name and complete mailing address)<br>John McDuffie<br>800 Maine Ave S.W., Suite 900<br>Washington, DC 20024-2812                                                                                                                                                                                                                                                                                                                                                                                                                                            |                                                          |                                           |                                                             |
| Editor (Name and complete mailing address)<br>Mark Hyman Rapaport, M.D.<br>800 Maine Ave S.W., Suite 900<br>Washington, DC 20024-2812                                                                                                                                                                                                                                                                                                                                                                                                                                   |                                                          |                                           |                                                             |
| Managing Editor (Name and complete mailing address)<br>Demarie S. Jackson<br>800 Maine Ave S.W., Suite 900<br>Washington, DC 20024-2812                                                                                                                                                                                                                                                                                                                                                                                                                                 |                                                          |                                           |                                                             |
| 10. Owner (Do not leave blank. If the publication is owned by a corporation, give the name and address of the corporation immediately followed by the names and addresses of all stockholders owning or holding 1 percent or more of the total amount of stock. If not owned by a corporation, give names and addresses of the individual owners. If owned by a partnership or other unincorporated firm, give its name and address as well as those of each individual owner. If the publication is published by a nonprofit organization, give its name and address.) |                                                          |                                           |                                                             |
| Full Name                                                                                                                                                                                                                                                                                                                                                                                                                                                                                                                                                               | Complete Mailing Address                                 |                                           |                                                             |
| American Psychiatric Assoc.                                                                                                                                                                                                                                                                                                                                                                                                                                                                                                                                             | 800 Maine Ave S.W., Suite 900, Washington, DC 20024-2812 |                                           |                                                             |
|                                                                                                                                                                                                                                                                                                                                                                                                                                                                                                                                                                         |                                                          |                                           |                                                             |
|                                                                                                                                                                                                                                                                                                                                                                                                                                                                                                                                                                         |                                                          |                                           |                                                             |
| 11. Known Bondholders, Mortgagees, and Other Security Holders Owning or Holding 1 Percent or More of Total Amount of Bonds, Mortgages, or Other Securities. If none, check box <input checked="" type="checkbox"/> None                                                                                                                                                                                                                                                                                                                                                 |                                                          |                                           |                                                             |
| Full Name                                                                                                                                                                                                                                                                                                                                                                                                                                                                                                                                                               | Complete Mailing Address                                 |                                           |                                                             |
|                                                                                                                                                                                                                                                                                                                                                                                                                                                                                                                                                                         |                                                          |                                           |                                                             |
|                                                                                                                                                                                                                                                                                                                                                                                                                                                                                                                                                                         |                                                          |                                           |                                                             |

PS Form 3526, September 2007 (Page 1)

PRIVACY NOTICE: See our privacy policy on [www.usps.com](http://www.usps.com)

|                                                                                                                                                                                                                                             |                                                                                                                                                                    |                                                          |                                                             |
|---------------------------------------------------------------------------------------------------------------------------------------------------------------------------------------------------------------------------------------------|--------------------------------------------------------------------------------------------------------------------------------------------------------------------|----------------------------------------------------------|-------------------------------------------------------------|
| 13. Publication Title<br>AMERICAN PSYCHIATRIC PUBLISHING INC/FOCUS                                                                                                                                                                          |                                                                                                                                                                    | 14. Issue Date for Circulation Data Below<br>08/01/2020  |                                                             |
| 15. Extent and Nature of Circulation                                                                                                                                                                                                        |                                                                                                                                                                    | Average No. Copies Each Issue During Preceding 12 Months | No. Copies of Single Issue Published Nearest to Filing Date |
| b. Total Numbers of Copies (Net press run)                                                                                                                                                                                                  |                                                                                                                                                                    | 2201                                                     | 2220                                                        |
| b. Paid Circulation (By Mail and Outside the Mail)                                                                                                                                                                                          | (1) Mailed Outside County Paid Subscriptions Stated on PS Form 3541 (include paid distribution above nominal rate, advertiser's proof copies, and exchange copies) | 1396                                                     | 1506                                                        |
|                                                                                                                                                                                                                                             | (2) Mailed In-County Paid Subscriptions Stated on PS Form 3541 (include paid distribution above nominal rate, advertiser's proof copies, and exchange copies)      | 0                                                        | 0                                                           |
|                                                                                                                                                                                                                                             | (3) Paid Distribution Outside the Mails Including Sales Through Dealers and Carriers, Street Vendors, Counter Sales, and Other Paid Distribution Outside USPS      | 56                                                       | 57                                                          |
|                                                                                                                                                                                                                                             | (4) Paid Distribution by Other Classes of Mail Through the USPS (e.g. First-Class Mail)                                                                            | 0                                                        | 0                                                           |
| c. Total Paid Distribution (Sum of 15b (1), (2), (3), (4))                                                                                                                                                                                  |                                                                                                                                                                    | 1452                                                     | 1563                                                        |
| d. Free or Nominal Rate Distribution (By Mail and Outside the Mail)                                                                                                                                                                         | (1) Free or Nominal Rate Outside County Copies included on PS Form 3541                                                                                            | 149                                                      | 149                                                         |
|                                                                                                                                                                                                                                             | (2) Free or Nominal Rate In-County Copies included on PS Form 3541                                                                                                 | 0                                                        | 0                                                           |
|                                                                                                                                                                                                                                             | (3) Free or Nominal Rate Copies Mailed at Other Classes Through the USPS (e.g. First-Class Mail)                                                                   | 0                                                        | 0                                                           |
|                                                                                                                                                                                                                                             | (4) Free or Nominal Rate Distribution Outside the Mail (Carriers or other means)                                                                                   | 93                                                       | 93                                                          |
| e. Total Free or Nominal Rate Distribution (Sum of 15d (1), (2), (3), (4))                                                                                                                                                                  |                                                                                                                                                                    | 242                                                      | 242                                                         |
| f. Total Distribution (Sum of 15c and 15e)                                                                                                                                                                                                  |                                                                                                                                                                    | 1694                                                     | 1805                                                        |
| g. Copies not Distributed                                                                                                                                                                                                                   |                                                                                                                                                                    | 0                                                        | 0                                                           |
| h. Total (Sum of 15f and 15g)                                                                                                                                                                                                               |                                                                                                                                                                    | 1694                                                     | 1805                                                        |
| i. Percent Paid ((15c / 15f) times 100)                                                                                                                                                                                                     |                                                                                                                                                                    | 85.71 %                                                  | 86.59 %                                                     |
| 16. If total circulation includes electronic copies, report that circulation on lines below.                                                                                                                                                |                                                                                                                                                                    |                                                          |                                                             |
| a. Paid Electronic Copies                                                                                                                                                                                                                   | 0                                                                                                                                                                  | 0                                                        | 0                                                           |
| b. Total Paid Print Copies (Line 15c) + Paid Electronic Copies                                                                                                                                                                              | 0                                                                                                                                                                  | 0                                                        | 0                                                           |
| c. Total Print Distribution (Line 15f) + Paid Electronic Copies                                                                                                                                                                             | 0                                                                                                                                                                  | 0                                                        | 0                                                           |
| d. Percent Paid (Both Print and Electronic Copies)                                                                                                                                                                                          | 0.00 %                                                                                                                                                             | 0.00 %                                                   | 0.00 %                                                      |
| <input type="checkbox"/> I certify that 50% of all my distributed copies (Electronic and Print) are paid above a nominal price.                                                                                                             |                                                                                                                                                                    |                                                          |                                                             |
| 17. Publication of Statement of Ownership                                                                                                                                                                                                   |                                                                                                                                                                    |                                                          |                                                             |
| <input checked="" type="checkbox"/> If the publication is a general publication, publication of this statement is required. Will be printed in the 11/01/2020 issue of this publication. <input type="checkbox"/> Publication not required. |                                                                                                                                                                    |                                                          |                                                             |
| 18. Signature and Title of Editor, Publisher, Business Manager, or Owner<br>Debra Eubanks                                                                                                                                                   |                                                                                                                                                                    | Title<br>Director, Publishing Business Operations        | Date<br>09/23/2020 09:41:16 AM                              |

I certify that all information furnished on this form is true and complete. I understand that anyone who furnishes false or misleading information on this form or who omits material or information requested on the form may be subject to criminal sanctions (including fines and imprisonment) and/or civil sanctions (including civil penalties).

PS Form 3526, September 2007 (Page 2)

PRIVACY NOTICE: See our privacy policy on [www.usps.com](http://www.usps.com)

# Student Mental Health

*A Guide for Psychiatrists,  
Psychologists, and Leaders*

*Serving in Higher Education*

Edited by Laura Weiss Roberts, M.D., M.A.

## Student Mental Health

is both down-to-earth and aspirational, providing evidence and best practices to ensure greater mental health on campus, while stimulating conversation about how to ensure and optimize the value of higher education through thoughtful, sophisticated approaches to student mental health.

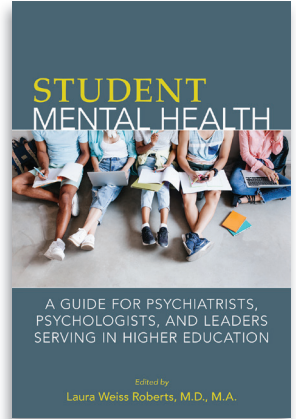

The chapter authors address life transitions and the university student experience, as well as the challenges of caring for university students with mental health issues.

The book has positive strategies, including ways to foster mental health for distinct university student populations.

2018 • 530 pages • ISBN 978-1-61537-114-3 • Paperback • \$62.00 • Item #37114

2018 • 530 pages • ISBN 978-1-61537-194-5 • eBook • \$49.95 • Item #37194

AMERICAN  
PSYCHIATRIC  
ASSOCIATION  
PUBLISHING

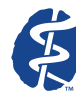

[www.appi.org](http://www.appi.org)  
Toll Free: 1-800-368-5777  
Email: [appi@psych.org](mailto:appi@psych.org)

**20% Discount • American Psychiatric Association Members**

**25% Discount • APA Resident-Fellow Members**

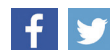

AH1846
