FALL 2020 | VOLUME 18 | NUMBER 4

# Focus

The Journal of Lifelong Learning in Psychiatry

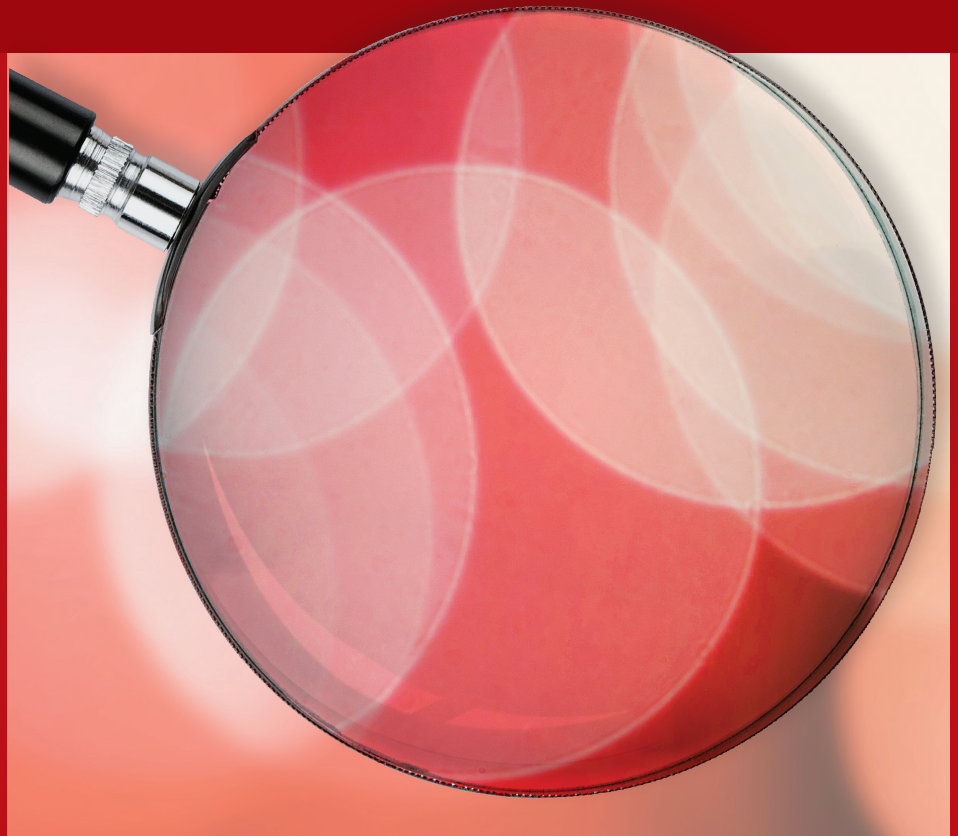

**Progress in Schizophrenia Research and Treatment**

Guest Editor: Peter F. Buckley, M.D.

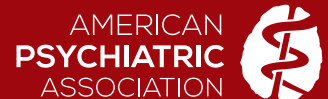

[focus.psychiatryonline.org](http://focus.psychiatryonline.org)
