

# Better

Serious mental illness (SMI) involves complex issues. That means mental health clinicians often look for better solutions to complex needs.

Now you can access SMI Adviser's free tools to help guide the way. Access 100+ on-demand courses on SMI. Submit questions to our national experts. Search our online Knowledge Base for evidence-based answers, resources and fact sheets. It is a better way to advance person-centered care for individuals who have SMI.

Access all the free resources from SMI Adviser today.

**Better clinical support. Better resources. Better care for people who have SMI.**

**Join our #MissionForBetter at [SMIadviser.org](https://SMIadviser.org)**

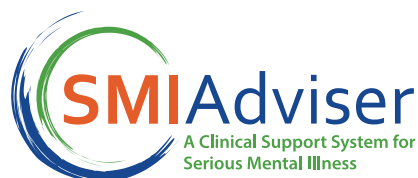

**GRANT STATEMENT**

Funding for this initiative was made possible (in part) by Grant No. 1H79SM080818-01 from SAMHSA. The views expressed in written conference materials or publications and by speakers and moderators do not necessarily reflect the official policies of the Department of Health and Human Services; nor does mention of trade names, commercial practices, or organizations imply endorsement by the U.S. Government.

© 2020 American Psychiatric Association. All rights reserved.

An APA and SAMHSA Initiative

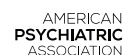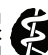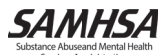

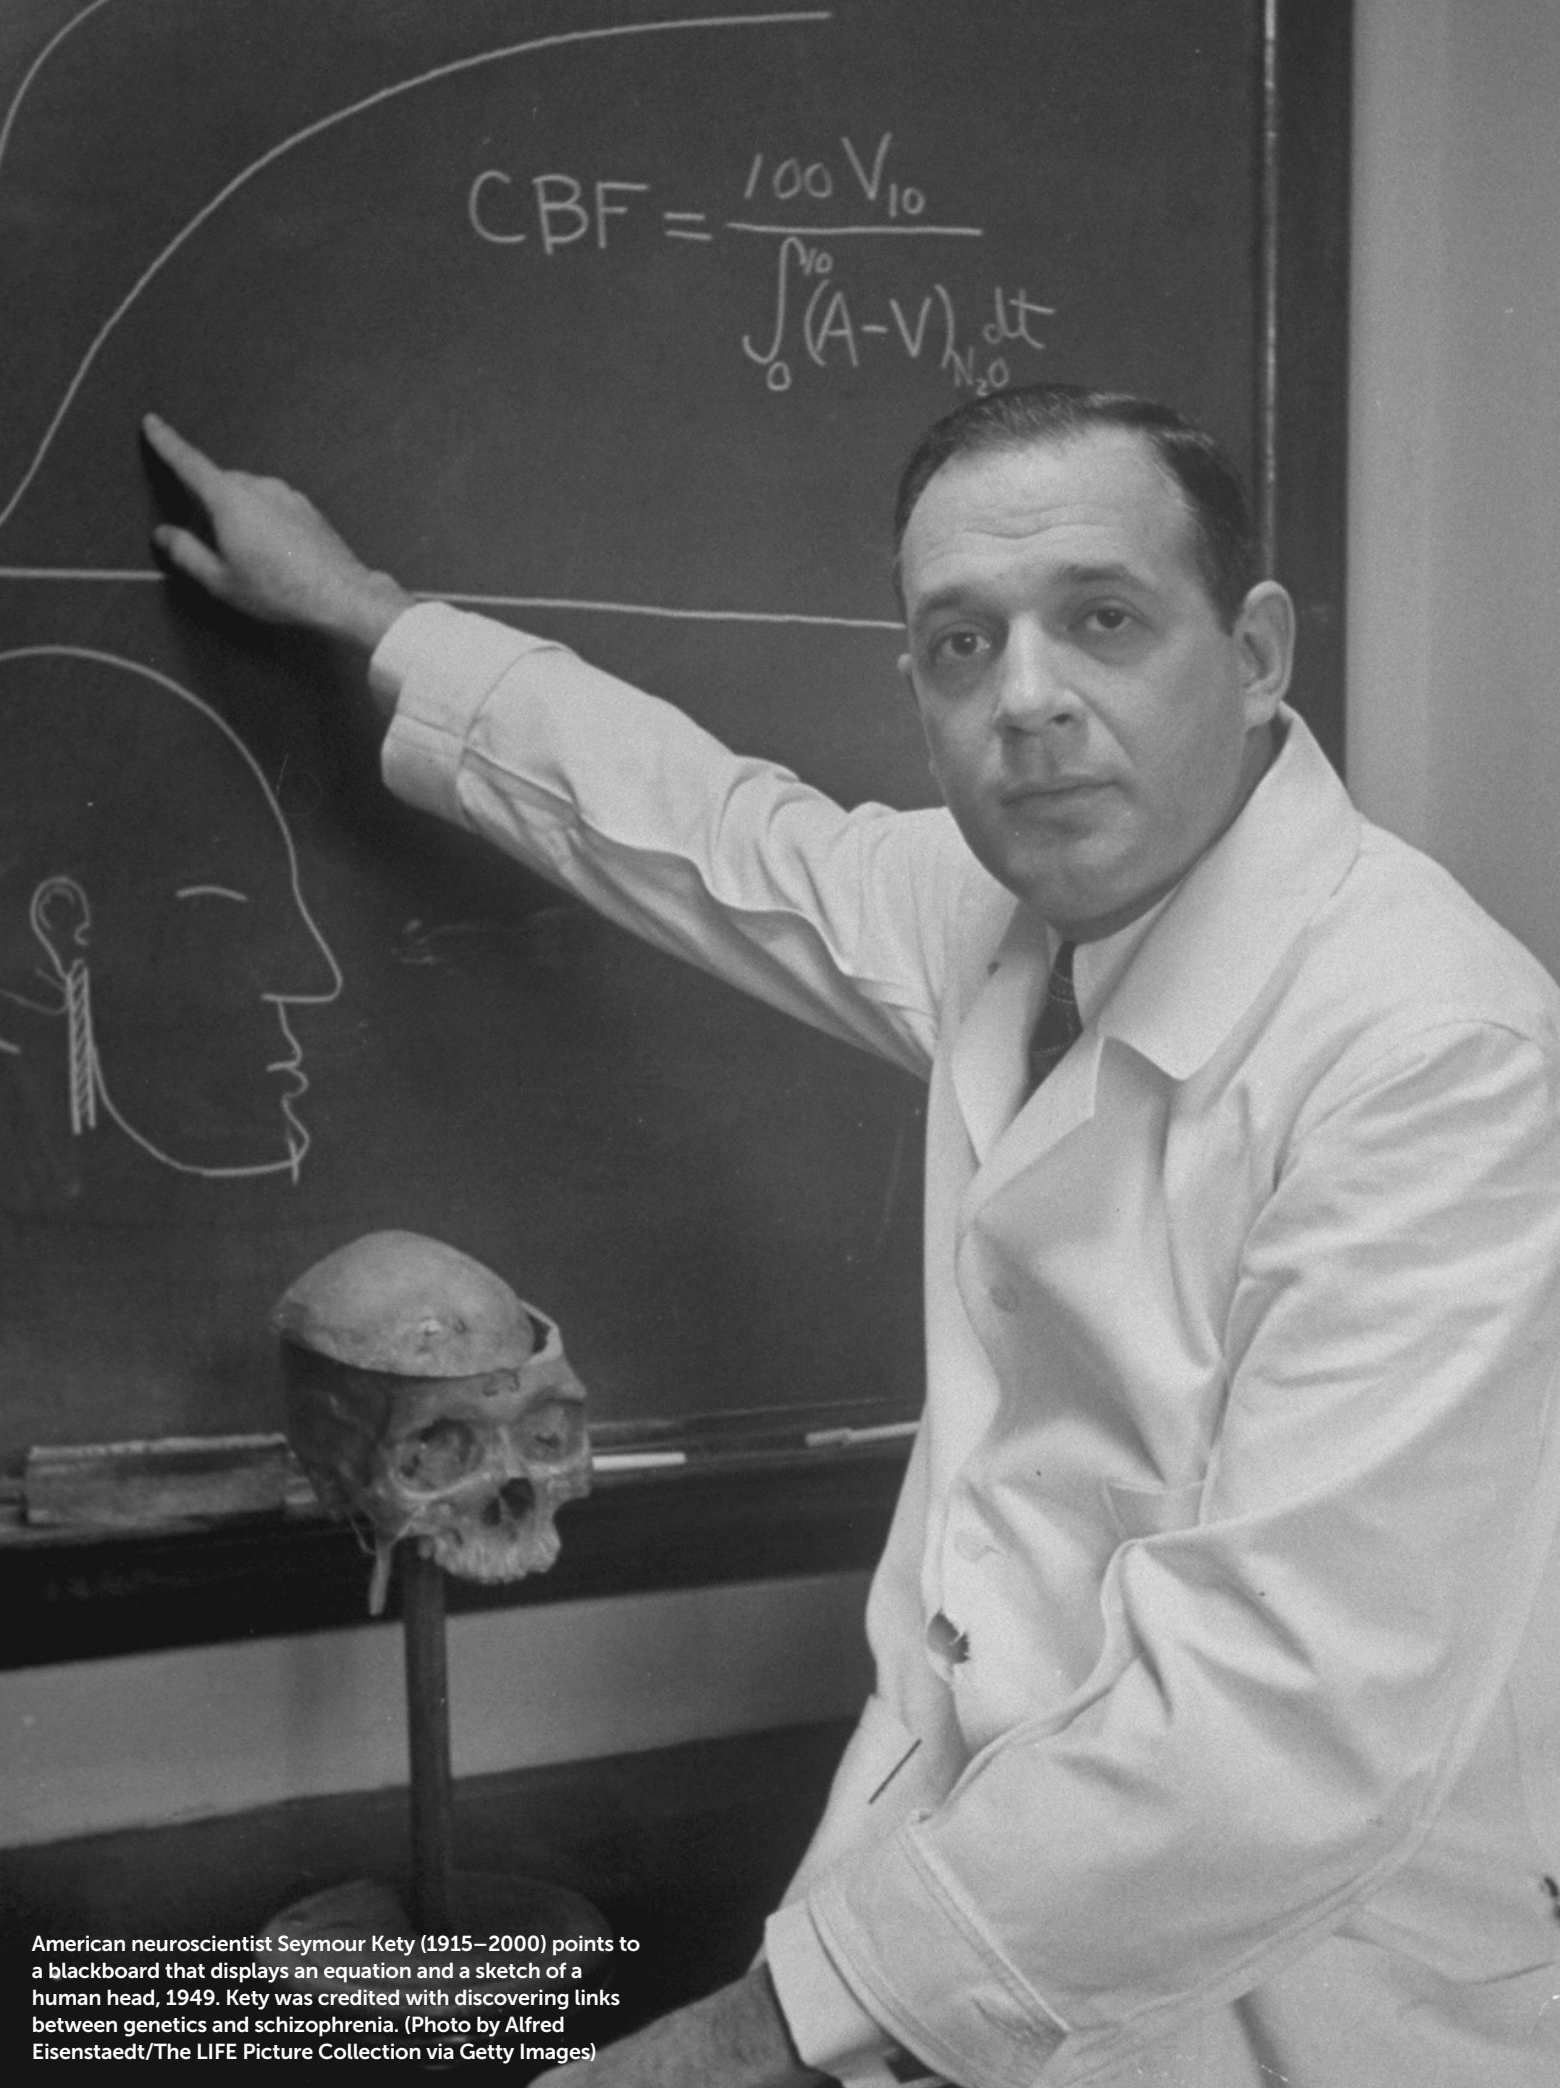

$$CBF = \frac{100 V_{10}}{\int_0^{N_{10}} (A-V)_{N_{20}} dt}$$

American neuroscientist Seymour Kety (1915–2000) points to a blackboard that displays an equation and a sketch of a human head, 1949. Kety was credited with discovering links between genetics and schizophrenia. (Photo by Alfred Eisenstaedt/The LIFE Picture Collection via Getty Images)
